# Supplementary material
Source: publisher figshare collection journal article supplement (https://gsajournals.figshare.com/ndownloader/files/25279337)
Supplement: Supplementary file 1 [file 25279337]

## Sheet: Sheet1
Data type	Experimental species	Symbol/name used in publication	Source – public	Source – published	Source – unpublished	Identifiers	New reagent	Comments
Data type (mandatory) Duplicate rows as needed. Order is flexible, but row titles must be preserved.	Experimental species (mandatory, "NA" okay)	Symbol/name used in publication (mandatory)	Source – public [stock center; company, data repository] (one of D,E,F mandatory)	Source -- published [PMID or 'this paper'] (one of D,E,F mandatory)	Source – unpublished [description, incl. lab of origin] (one of D,E,F mandatory)	Identifiers [format as ID_source:identifier] Separate multiple entries with semi-colon, space	New reagent (mandatory for new entities) Description, progenitor(s)	Comments (optional) Genotypes, purpose of reagent, additional information
gene (source not applicable)	Drosophila melanogaster	br	NA	NA	NA	FBgn0283451
gene (source not applicable)	Drosophila melanogaster	CG3355	NA	NA	NA	FBgn0031619
gene (source not applicable)	Drosophila melanogaster	CG5639	NA	NA	NA	FBgn0039527
gene (source not applicable)	Drosophila melanogaster	CG8170	NA	NA	NA	FBgn0033365
gene (source not applicable)	Drosophila melanogaster	CG9416	NA	NA	NA	FBgn0034438
gene (source not applicable)	Drosophila melanogaster	Stubble	NA	NA	NA	FBgn0003319
gene (source not applicable)	Drosophila melanogaster	Serine Protease Immune Response Integrator	NA	NA	NA	FBgn0030051
gene (source not applicable)	Drosophila melanogaster	Enhancer of split m4	NA	NA	NA	FBgn0002629
gene (source not applicable)	Drosophila melanogaster	Enhancer of split m7	NA	NA	NA	FBgn0002633
gene (source not applicable)	Drosophila melanogaster	Enhancer of split m8	NA	NA	NA	FBgn0000591
gene (source not applicable)	Drosophila melanogaster	Enhancer of split malpha	NA	NA	NA	FBgn0002732
gene (source not applicable)	Drosophila melanogaster	Enhancer of split mgamma	NA	NA	NA	FBgn0002735
gene (source not applicable)	Drosophila melanogaster	Scabrous	NA	NA	NA	FBgn0003326
gene (source not applicable)	Drosophila melanogaster	Ecdysone-induced gene 71Ec	NA	NA	NA	FBgn0004590
gene (source not applicable)	Drosophila melanogaster	Ecdysone-induced gene 71Ed	NA	NA	NA	FBgn0004591
gene (source not applicable)	Drosophila melanogaster	Ecdysone-induced gene 71Ef	NA	NA	NA	FBgn0004593
gene (source not applicable)	Drosophila melanogaster	Ecdysone-induced gene 71Eg	NA	NA	NA	FBgn0004594
gene (source not applicable)	Drosophila melanogaster	dusky	NA	NA	NA	FBgn0004511
gene (source not applicable)	Drosophila melanogaster	Imaginal disc growth factor 4	NA	NA	NA	FBgn0026415
gene (source not applicable)	Drosophila melanogaster	serpentine	NA	NA	NA	FBgn0260653
gene (source not applicable)	Drosophila melanogaster	vermiform	NA	NA	NA	FBgn0261341
gene (source not applicable)	Drosophila melanogaster	Amalgam	NA	NA	NA	FBgn0000071
gene (source not applicable)	Drosophila melanogaster	CG5758	NA	NA	NA	FBgn0032666
gene (source not applicable)	Drosophila melanogaster	slowdown	NA	NA	NA	FBgn0035539
gene (source not applicable)	Drosophila melanogaster	CG10960	NA	NA	NA	FBgn0036316
gene (source not applicable)	Drosophila melanogaster	CG12026	NA	NA	NA	FBgn0262624
gene (source not applicable)	Drosophila melanogaster	grainy head	NA	NA	NA	FBgn0259211
gene (source not applicable)	Drosophila melanogaster	Ecdysone-inducible gene E3	NA	NA	NA	FBgn0001255
gene (source not applicable)	Drosophila melanogaster	Aldolase 1	NA	NA	NA	FBgn0000064
gene (source not applicable)	Drosophila melanogaster	Enolase	NA	NA	NA	FBgn0000579
gene (source not applicable)	Drosophila melanogaster	Glyceraldehyde 3 phosphate dehydrogenase 2	NA	NA	NA	FBgn0001092
gene (source not applicable)	Drosophila melanogaster	Glycogen phosphorylase	NA	NA	NA	FBgn0004507
gene (source not applicable)	Drosophila melanogaster	Phosphofructokinase	NA	NA	NA	FBgn0003071
gene (source not applicable)	Drosophila melanogaster	Phosphoglycerate kinase	NA	NA	NA	FBgn0250906
gene (source not applicable)	Drosophila melanogaster	Phosphoglyceromutase 78	NA	NA	NA	FBgn0014869
gene (source not applicable)	Drosophila melanogaster	Phosphoglucose mutase 1	NA	NA	NA	FBgn0003076
gene (source not applicable)	Drosophila melanogaster	Triose phosphate isomerase	NA	NA	NA	FBgn0086355
strain, strain_background	Drosophila melanogaster	br[1]	Bloomington Drosophila Stock Center			BDSC:3994
strain, strain_background	Drosophila melanogaster	br[5]	Bloomington Drosophila Stock Center			BDSC:29972
strain, strain_background	Drosophila melanogaster	w[1118]	Bloomington Drosophila Stock Center			BDSC:5905
strain, strain_background	Drosophila melanogaster	Vkg-GFP		PMID: 11742088
strain, strain_background	Drosophila melanogaster	Dll-GAL4	Bloomington Drosophila Stock Center			BDSC:3038
strain, strain_background	Drosophila melanogaster	UAS-Dcr	Bloomington Drosophila Stock Center			BDSC:24644
strain, strain_background	Drosophila melanogaster	TRiP br RNAi line	Bloomington Drosophila Stock Center			BDSC:27272
strain, strain_background	Drosophila melanogaster	TRiP CG3355 RNAi line	Bloomington Drosophila Stock Center			BDSC:52897
strain, strain_background	Drosophila melanogaster	TRiP CG5639 RNAi line	Bloomington Drosophila Stock Center			BDSC:57376
strain, strain_background	Drosophila melanogaster	TRiP CG8170 RNAi line	Bloomington Drosophila Stock Center			BDSC:61889
strain, strain_background	Drosophila melanogaster	TRiP CG9416 RNAi line	Bloomington Drosophila Stock Center			BDSC:57563
strain, strain_background	Drosophila melanogaster	TRiP Serine Protease Immune Response Integrator RNAi line	Bloomington Drosophila Stock Center			BDSC:42882
strain, strain_background	Drosophila melanogaster	TRiP Enhancer of split m4 RNAi line	Bloomington Drosophila Stock Center			BDSC:61261
strain, strain_background	Drosophila melanogaster	TRiP Enhancer of split m7 RNAi line	Bloomington Drosophila Stock Center			BDSC:29327
strain, strain_background	Drosophila melanogaster	TRiP Enhancer of split m8 RNAi line	Bloomington Drosophila Stock Center			BDSC:26322
strain, strain_background	Drosophila melanogaster	TRiP Enhancer of split mgamma RNAi line	Bloomington Drosophila Stock Center			BDSC:51762
strain, strain_background	Drosophila melanogaster	TRiP scabrous RNAi line	Bloomington Drosophila Stock Center			BDSC:56928
strain, strain_background	Drosophila melanogaster	TRiP Ecdysone-induced gene 71Ec RNAi line	Bloomington Drosophila Stock Center			BDSC:57384
strain, strain_background	Drosophila melanogaster	TRiP Ecdysone-induced gene 71Ed RNAi line	Bloomington Drosophila Stock Center			BDSC:56952
strain, strain_background	Drosophila melanogaster	TRiP Ecdysone-induced gene 71Ef RNAi line	Bloomington Drosophila Stock Center			BDSC:55930
strain, strain_background	Drosophila melanogaster	TRiP Ecdysone-induced gene 71Eg RNAi line	Bloomington Drosophila Stock Center			BDSC:56953
strain, strain_background	Drosophila melanogaster	TRiP dusky RNAi line	Bloomington Drosophila Stock Center			BDSC:34382
strain, strain_background	Drosophila melanogaster	TRiP Imaginal disc growth factor 4 RNAi line	Bloomington Drosophila Stock Center			BDSC:55381
strain, strain_background	Drosophila melanogaster	TRiP serpentine RNAi line	Bloomington Drosophila Stock Center			BDSC:65104
strain, strain_background	Drosophila melanogaster	TRiP vermiform RNAi line	Bloomington Drosophila Stock Center			BDSC:57188
strain, strain_background	Drosophila melanogaster	TRiP Amalgam RNAi line	Bloomington Drosophila Stock Center			BDSC:33416
strain, strain_background	Drosophila melanogaster	TRiP CG5758 RNAi line	Bloomington Drosophila Stock Center			BDSC:57808
strain, strain_background	Drosophila melanogaster	TRiP CG10960 RNAi line	Bloomington Drosophila Stock Center			BDSC:34598
strain, strain_background	Drosophila melanogaster	TRiP grainy head RNAi line	Bloomington Drosophila Stock Center			BDSC:42611
strain, strain_background	Drosophila melanogaster	TRiP Aldolase 1 RNAi line	Bloomington Drosophila Stock Center			BDSC: 65884
strain, strain_background	Drosophila melanogaster	TRiP enolase RNAi line	Bloomington Drosophila Stock Center			BDSC: 26300
strain, strain_background	Drosophila melanogaster	TRiP Glyceraldehyde 3 phosphate dehydrogenase 2 RNAi line	Bloomington Drosophila Stock Center			BDSC: 26302
strain, strain_background	Drosophila melanogaster	TRiP Glycogen phosphorylase RNAi line	Bloomington Drosophila Stock Center			BDSC: 33634
strain, strain_background	Drosophila melanogaster	TRiP Phosphofructokinase RNAi line	Bloomington Drosophila Stock Center			BDSC: 34336
strain, strain_background	Drosophila melanogaster	TRiP Phosphoglycerate kinase RNAi line	Bloomington Drosophila Stock Center			BDSC: 33633
strain, strain_background	Drosophila melanogaster	TRiP Phosphoglyceromutase 78 RNAi line	Bloomington Drosophila Stock Center			BDSC: 26303
strain, strain_background	Drosophila melanogaster	TRiP Phosphoglucose mutase 1 RNAi line	Bloomington Drosophila Stock Center			BDSC: 34345
strain, strain_background	Drosophila melanogaster	Pgm1[LA00593]	Bloomington Drosophila Stock Center			BDSC: 22244
strain, strain_background	Drosophila melanogaster	TRiP Triose phosphate isomerase RNAi line	Bloomington Drosophila Stock Center			BDSC: 51829
strain, strain_background	Drosophila melanogaster	VDRC CG9416 RNAi line	Vienna Drosophila RNAi Stock Center			VDRC:10064
strain, strain_background	Drosophila melanogaster	VDRC Enhancer of split m8 RNAi line	Vienna Drosophila RNAi Stock Center			VDRC:37686
strain, strain_background	Drosophila melanogaster	VDRC Enhancer of split malpha RNAi line	Vienna Drosophila RNAi Stock Center			VDRC:35886
strain, strain_background	Drosophila melanogaster	VDRC dusky RNAi line	Vienna Drosophila RNAi Stock Center			VDRC:3299
strain, strain_background	Drosophila melanogaster	VDRC Amalgam RNAi line	Vienna Drosophila RNAi Stock Center			VDRC:22944
strain, strain_background	Drosophila melanogaster	VDRC slowdown RNAi line	Vienna Drosophila RNAi Stock Center			VDRC:106464
strain, strain_background	Drosophila melanogaster	VDRC CG12026 RNAi line	Vienna Drosophila RNAi Stock Center			VDRC:42480
strain, strain_background	Drosophila melanogaster	VDRC Ecdysone-inducible gene E3 RNAi line	Vienna Drosophila RNAi Stock Center			VDRC:16402
strain, strain_background	Drosophila melanogaster	loxl1-RNAi line	Vienna Drosophila RNAi Stock Center			VDRC:17259
strain, strain_background	Drosophila melanogaster	HS-br-Z2		PMID: 9242423
strain, strain_background	Drosophila melanogaster	UAS-serp		PMID: 16431371
strain, strain_background	Drosophila melanogaster	UAS-verm		PMID: 16431370
antibody	Drosophila melanogaster (rat antibody targeting Drosophila protein)	anti-Decadherin	DSHB			DSHB:DCAD2
antibody	Drosophila melanogaster (rabbit antibody targeting Drosophila protein)	anti-Vermiform		PMID: 16431371
antibody	Donkey	(donkey anti-rat Cy2 secondary antibody)	Jackson ImmunoResearch Laboratories, West Grove, PA
antibody	Donkey	(donkey anti-rabbit Cy3 secondary antibody)	Jackson ImmunoResearch Laboratories, West Grove, PA
large-scale dataset	Drosophila melanogaster	w1118 and br5 leg imaginal disc RNAseq	GEO	this paper		GEO:GSE140248
commercial assay	NA	ATP Determination Kit	Molecular Probes A22066, Eugene, OR
chemical compound, drug	NA	Trypsin	Gibco			25200-056
software, algorithm	NA	Fast QC (version 0.11.5)			https://www.bioinformatics.babraham.ac.uk/projects/fastqc/
software, algorithm	NA	Trimmomatic (version 0.36)		PMID: 24695404
software, algorithm	NA	TopHat (version2.1.1)		PMID:19289445, PMID:23618408
software, algorithm	NA	Cufflinks (version 2.2.1)		PMID:20436464, PMID:21410973, PMID:23222703
software, algorithm	NA	Gene Ontology Gene Enrichment Tool		PMID:25428369
software, algorithm	NA	WebGestalt Over-Representation Analysis		PMID:28472511
